# Supplementary material
Source: PubMed Central journal article supplement (PMC2981386)
Supplement: supp_mol.110.064618_Suppl_Tab1.pdf [file supp_mol.110.064618_Suppl_Tab1.pdf]

**Title:** A Functional Crosstalk Between LXR $\alpha$  And CAR Links Lipogenesis And Xenobiotic Responses

**Authors:** Yonggong Zhai, Tara Wada, Bin Zhang, Shaheen Khadem, Songrong Ren, Ramalinga Kuruba, Song Li, Wen Xie

**Journal:** Molecular Pharmacology

**Supplementary Table. Sequences of real-time PCR primers:**

---

*Srebp-1c* 5'-GGAGCCATGGATTGCACATT-3'

5'-GGCCCGGGAAGTCACTGT-3'

*Acc-1* 5'-TGACAGACTGATCGCAGAGAAAG-3'

5'-TGGAGAGCCCCACACACA-3'

*Fas* 5'-GCTGCGGAAACTTCAGGAAAT-3'

5'-AGAGACGTGTCACTCCTGGACTT-3'

*Scd-1* 5'-TGCCCCCTGCGGATCTT-3'

5'-GCCCATTCGTACACGTCATT-3'

*Abcg5* 5'-TCAATGAGTTTTACGGCCTGAA-3'

5'-GCACATCGGGTGATTTAGCA-3'

*Abcg8* 5'-TGCCCACCTTCCACATGTC-3'

5'-ATGAAGCCGGCAGTAAGGTAGA-3'

*Cyp3a11* 5'-AAACTGCAGGATGAGATCGATGA-3'

5'-TCCAGGTATTCCATCTCCATCAC-3'

*Cyp2b10* 5'-GCATTTGTCTTGGTGAAAGCATT-3'

5'-GGATGGACGTGAAGAAAAGGAA-3'

---
